# Supplementary material for: Decreased brain modularity after psilocybin therapy for depression.
Source: Research Square preprint supplement (doi:10.21203/rs.3.rs-513323/v1), 2021-05-20
Supplement: Supplementary file 1 [file 97b078cf2ad237779a988fc1.docx]

# Supplemental materials

**eMethods**

## **MRI acquisition**

Brain imaging was performed on a 3 T Siemens Tim Trio at Invicro, London, UK. Anatomical images were acquired using the ADNI-GO (Alzheimer’s Disease Neuroimaging Initiative, Grand Opportunity 1) recommended MPRAGE parameters (1 mm isotropic voxels, TR = 2300 ms, TE = 2.98 ms, 160 sagittal slices, 256 × 256 in-plane FOV, flip angle = 9 degrees, bandwidth = 240 Hz/pixel, GRAPPA acceleration = 2).

In both studies, fMRI data were collected with T2*-weighted echo-planar images (EPI) with 3 mm isotropic voxels. In study 1, a 12 channel head coil was used to acquire 240 volumes in ~8 minutes: TR = 2000 ms, TE = 31 ms, 36 axial slices, flip angle = 80 degrees, bandwidth = 2298 Hz/pixel, GRAPPA acceleration = 2). In study 2, a 32-channel head coil was used to acquire 480 multiband-accelerated (2x) volumes were acquired in ~10 minutes: TR = 1250 ms, TE = 30 ms, 44 axial slices, flip angle = 70 degrees, bandwidth = 2232 Hz/pixel, GRAPPA acceleration = 2).

## **MRI preprocessing**

Imaging data were preprocessed via a custom in-house pipeline composed of tools from the FMRIB Software Library (FSL) 2, Analysis of Functional NeuroImages (AFNI) 3, Freesurfer 4 and Advanced Normalisation Tools (ANTs) 5 packages. Patients were excluded if either fMRI scan contained >20% of volumes with a framewise displacement (FD) greater than 0.5 mm 6.

Specifically, the following pre-processing stages were performed: 1) removal of the first three volumes; 2) de-spiking (3dDespike, AFNI); 3) slice time correction (3dTshift, AFNI); 4) motion correction (3dvolreg, AFNI) by registering each volume to the volume most similar, in the least-squares sense, to all others; 5) brain extraction (BET, FSL); 6) rigid body registration to anatomical scans (BBR, FSL); 7) non-linear registration to 2 mm MNI brain (Symmetric Normalization (SyN), ANTS); 8) scrubbing 7 - using a framewise displacement (FD) threshold of 0.5 mm, scrubbed volumes were replaced with the mean of the neighbouring volumes. 9) 6mm full width at half maximum (FWHM) gaussian spatial smoothing (3dBlurInMask, AFNI); 10) 0.01 to 0.08 Hz band-pass filtering (3dFourier, AFNI); 11) linear and quadratic de-trending (3dDetrend, AFNI); 12) Voxelwise nuisance regression with the 6 realignment motion regressors and 3 tissue signal regressors (ventricles (Freesurfer, eroded in 2 mm space), draining veins (DV) (FSL’s CSF minus Freesurfer’s Ventricles, eroded in 1 mm space) and local white matter (WM) (FSL’s WM minus Freesurfer’s subcortical grey matter (GM) structures, eroded in 2 mm space). Regarding local WM regression, AFNI’s 3dLocalstat was used to calculate the mean local WM time-series for each voxel, using a 25 mm radius sphere centred on each voxel 8**.**

## **Functional connectivity (FC)**

## A functional atlas was used to separate the cerebral cortex into 100 regions of interest (ROI) 9. We then estimated the FC between each pair of ROIs by calculating a Pearson correlation coefficient between each pair of mean signal ‘timecourses’ (representing fluctuations in neural activity over time). This resulted in an FC matrix, with each element representing the connectivity strength between a pair of ROIs. Positive values were retained and Fisher transformed to z-scores. This procedure was repeated for each patient and scan (baseline, follow-up).

## **Modularity**

The FC matrices were used to summarise the community structure and segregation of brain networks using a common Louvain-like community detection algorithm 10 where the objective is to maximise the extent to which brain areas can be separated into non-overlapping communities or modules 11. The modularity quality function score, 11–13, tends to be high when the brain exhibits a high segregation between its functional networks (e.g., strong clusters of FC within brain networks/communities with weak FC to the rest of the brain).

This approach has been commonly applied to fMRI data to characterise how brain function adapts in a number of contexts 14,15, including in depression studies 16,17. Here, modularity, , 11,18 was defined in the standard way by:

|  |  | (1) |
| --- | --- | --- |

Where represents the weight of FC (correlation) between ROI and , is the structural resolution free parameter (set to 1) and is the expected null FC defined with as the total FC across all connections with ROI , is the community to which ROI is assigned, is the Kronecker delta function and equals 1 if ROI and belong to the same community and 0 otherwise 19 and is the total FC of the network.

To allow valid comparisons between patients and scans, the modularity scores were generated 100 times and the partition with the largest modularity score was normalised by the mean modularity generated from 100 randomly rewired (shuffled) FC matrices 20. This common procedure was applied to account for the non-deterministic and near-degenerate partitions (solutions with differing but similar optimality) generated by Louvain algorithms and to account for modularity scores relating to the total sum of FC within the network 21. This process was repeated independently for each patient and scan.

## **Functional cartography**

The community detection procedure generates a community assignment to each ROI. We used these labels to determine the extent to which ROIs were recruited to the functional network that they typically ‘belong to’, as defined by healthy adults (e.g., DMN regions should reliably form communities with each other).

First, we created an allegiance matrix, , 22,23 which represented the probability that two regions and were assigned to the same community across the 100 iterations of the modularity algorithm, defined here as:

|  |  | (2) |
| --- | --- | --- |

where as the number of partitions. For each partition, equals 1 if regions and belong to the same community.

Using the allegiance matrix, we then calculated scores for each region that summarised the extent that regions from the same functional network form communities together (recruitment) or regions from two different systems form communities together (integration) 22,23. These functional cartography measures were then normalised against the mean values from 1000 randomly shuffled ROI-network assignments to account for differences in the number of regions in each network 15. Recruitment and integration scores were then averaged at the network level using 7 predefined cortical networks 24.

## **Dynamic flexibility**

A dynamic flexibility analysis was conducted in study 2 using a multilayer modularity estimation 18,25. FC matrices were generated from 30-volume sliding-windows (37.5 seconds of real-time) with 50% overlap resulting in a matrixfor each patient and scan. This window size is typical for estimating dynamic FC with fMRI 26. Multilayer modularity, , was estimated 100 times from each FC matrix by:

|  |  | (3) |
| --- | --- | --- |

where is the total FC of the multilayer network, and is the total FC of layer , is the FC between ROI and at layer , is the expected null FC at layer . The two free and structural and temporal resolution parameters are used to scale the number of communities and strength of inter-layer edges, respectively. As is typical for dynamic modularity fMRI analyses, both were set to 1 15,23,27.

The multilayer modularity estimation generates an matrix where each element represents the community assignment of each ROI at each layer (time-window). From this, the flexibility metric, , can be simply calculated as the number of times an ROI changes its community allegiance, given the number of observations 23:

|  |  | (4) |
| --- | --- | --- |

Flexibility scores close to 0 represent rigid ROIs whose community allegiance is stable across time, scores close to 1 represent flexible ROIs whose community allegiance regularly changes (highly flexible).

References

1. Jack, C. R. *et al.* The Alzheimer’s disease neuroimaging initiative (ADNI): MRI methods. *J. Magn. Reson. Imaging* **27**, 685–691 (2008).

2. Smith, S. M. *et al.* Advances in functional and structural MR image analysis and implementation as FSL. *NeuroImage* **23**, S208–S219 (2004).

3. Cox, R. W. AFNI: Software for Analysis and Visualization of Functional Magnetic Resonance Neuroimages. *Comput. Biomed. Res.* **29**, 162–173 (1996).

4. Dale, A. M., Fischl, B. & Sereno, M. I. Cortical Surface-Based Analysis. *NeuroImage* **9**, 179–194 (1999).

5. Avants, B. B., Tustison, N. & Song, G. Advanced normalization tools (ANTS). *Insight J* **2**, 1–35 (2009).

6. Power, J. D. *et al.* Methods to detect, characterize, and remove motion artifact in resting state fMRI. *NeuroImage* **84**, 320–341 (2014).

7. Power, J. D., Barnes, K. A., Snyder, A. Z., Schlaggar, B. L. & Petersen, S. E. Spurious but systematic correlations in functional connectivity MRI networks arise from subject motion. *NeuroImage* **59**, 2142–2154 (2012).

8. Jo, H. J., Saad, Z. S., Simmons, W. K., Milbury, L. A. & Cox, R. W. Mapping sources of correlation in resting state FMRI, with artifact detection and removal. *NeuroImage* **52**, 571–582 (2010).

9. Schaefer, A. *et al.* Local-Global Parcellation of the Human Cerebral Cortex from Intrinsic Functional Connectivity MRI. *Cereb. Cortex* **28**, 3095–3114 (2018).

10. Blondel, V. D., Guillaume, J.-L., Lambiotte, R. & Lefebvre, E. Fast unfolding of communities in large networks. *J. Stat. Mech. Theory Exp.* **2008**, P10008 (2008).

11. Newman, M. E. J. Analysis of weighted networks. *Phys. Rev. E* **70**, 056131 (2004).

12. Newman, M. E. J. Modularity and community structure in networks. *Proc. Natl. Acad. Sci.* **103**, 8577–8582 (2006).

13. Newman, M. E. J. & Girvan, M. Finding and evaluating community structure in networks. *Phys. Rev. E* **69**, 026113 (2004).

14. Bassett, D. S. *et al.* Dynamic reconfiguration of human brain networks during learning. *Proc. Natl. Acad. Sci.* **108**, 7641–7646 (2011).

15. Finc, K. *et al.* Dynamic reconfiguration of functional brain networks during working memory training. *Nat. Commun.* **11**, 2435 (2020).

16. Gong, Q. & He, Y. Depression, Neuroimaging and Connectomics: A Selective Overview. *Biol. Psychiatry* **77**, 223–235 (2015).

17. Zheng, H. *et al.* The dynamic characteristics of the anterior cingulate cortex in resting-state fMRI of patients with depression. *J. Affect. Disord.* **227**, 391–397 (2018).

18. Mucha, P. J., Richardson, T., Macon, K., Porter, M. A. & Onnela, J.-P. Community Structure in Time-Dependent, Multiscale, and Multiplex Networks. *Science* **328**, 876–878 (2010).

19. Bassett, D. S. *et al.* Task-Based Core-Periphery Organization of Human Brain Dynamics. *PLoS Comput. Biol.* **9**, e1003171 (2013).

20. Maslov, S. & Sneppen, K. Specificity and Stability in Topology of Protein Networks. *Science* **296**, 910–913 (2002).

21. Rubinov, M. & Sporns, O. Weight-conserving characterization of complex functional brain networks. *NeuroImage* **56**, 2068–2079 (2011).

22. Bassett, D. S., Yang, M., Wymbs, N. F. & Grafton, S. T. Learning-induced autonomy of sensorimotor systems. *Nat. Neurosci.* **18**, 744–751 (2015).

23. Mattar, M. G., Cole, M. W., Thompson-Schill, S. L. & Bassett, D. S. A Functional Cartography of Cognitive Systems. *PLOS Comput. Biol.* **11**, e1004533 (2015).

24. Yeo, B. T. *et al.* The organization of the human cerebral cortex estimated by intrinsic functional connectivity. *J. Neurophysiol.* **106**, 1125–1165 (2011).

25. Lucas, G. S., Bazzi, M., Jutla, I. S. & Mucha, P. J. A generalized Louvain method for community detection implemented in MATLAB. (2016).

26. Leonardi, N. & Van De Ville, D. On spurious and real fluctuations of dynamic functional connectivity during rest. *NeuroImage* **104**, 430–436 (2015).

27. Harlalka, V., Bapi, R. S., Vinod, P. K. & Roy, D. Atypical Flexibility in Dynamic Functional Connectivity Quantifies the Severity in Autism Spectrum Disorder. *Front. Hum. Neurosci.* **13**, 6 (2019).
